# Supplementary material for: Metabolomic Profiling of Blood Plasma in Females with Hyperplasia and Endometrial Cancer
Source: MDPI journal article supplement (doi:10.3390/metabo14020109), 2024-02-06
Supplement: s1 [file s1]

**Table S1:** Characteristics of study subjects

| Sample ID | Sample type        | Age | BMI   | Diagnosis                               | Stage/Grade |
|-----------|--------------------|-----|-------|-----------------------------------------|-------------|
| EC1       | Endometrial Cancer | 70  | 33.69 | Endometrioid endometrial adenocarcinoma | 1A/G2       |
| EC2       | Endometrial Cancer | 60  | 48.50 | Endometrioid endometrial adenocarcinoma | 1A/G2       |
| EC 3      | Endometrial Cancer | 60  | 48.00 | Endometrioid endometrial adenocarcinoma | 1A/G1       |
| EC 4      | Endometrial Cancer | 45  | 29.90 | Endometrioid endometrial adenocarcinoma | 1B/G3       |
| EC 5      | Endometrial Cancer | 50  | 32.00 | Endometrioid endometrial adenocarcinoma | 1B/G1       |
| EC 6      | Endometrial Cancer | 68  | 27.89 | Endometrioid endometrial adenocarcinoma | 3C/G3       |
| EC 7      | Endometrial Cancer | 50  | 31.00 | Endometrioid endometrial adenocarcinoma | 3C/G2       |
| EC 8      | Endometrial Cancer | 72  | 25.36 | Endometrioid endometrial adenocarcinoma | 3A/G2       |
| EC 9      | Endometrial Cancer | 59  | 45.61 | Endometrioid endometrial adenocarcinoma | 1A/G3       |
| EC 10     | Endometrial Cancer | 54  | 30.00 | Endometrioid endometrial adenocarcinoma | 1A/G2       |
| EC 11     | Endometrial Cancer | 58  | 44.23 | Endometrioid endometrial adenocarcinoma | 1A/G1       |
| EC 12     | Endometrial Cancer | 52  | 35.02 | Endometrioid endometrial adenocarcinoma | 1A/G1       |
| EC 13     | Endometrial Cancer | 55  | 44.06 | Endometrioid endometrial adenocarcinoma | 1A/G1       |
| EC 14     | Endometrial Cancer | 62  | 29.36 | Endometrioid endometrial adenocarcinoma | 1B/G1       |
| EC 15     | Endometrial Cancer | 67  | 33.56 | Endometrioid endometrial adenocarcinoma | 1A/G2       |
| EC 16     | Endometrial Cancer | 63  | 37.25 | Endometrioid endometrial adenocarcinoma | 1A/G3       |
| EC 17     | Endometrial Cancer | 59  | 38.00 | Endometrioid endometrial adenocarcinoma | 1A/G2       |
| EC 18     | Endometrial Cancer | 58  | 34.01 | Endometrioid endometrial adenocarcinoma | 1A/G3       |
| EC 19     | Endometrial Cancer | 62  | 46.28 | Endometrioid endometrial adenocarcinoma | 1A/G2       |
| EC 20     | Endometrial Cancer | 66  | 35.98 | Endometrioid endometrial adenocarcinoma | 1A/G2       |
| HP 1      | Hyperplasia        | 49  | 26.03 | hyperplastic endometrium without atypia |             |
| HP 2      | Hyperplasia        | 49  | 32.00 | hyperplastic endometrium with atypia    |             |
| HP 3      | Hyperplasia        | 48  | 33.30 | hyperplastic endometrium with atypia    |             |
| HP 4      | Hyperplasia        | 48  | 34.20 | hyperplastic endometrium with atypia    |             |
| HP 5      | Hyperplasia        | 48  | 34.00 | hyperplastic endometrium without atypia |             |
| HP 6      | Hyperplasia        | 58  | 39.90 | hyperplastic endometrium with atypia    |             |
| HP 7      | Hyperplasia        | 65  | 38.20 | hyperplastic endometrium with atypia    |             |
| HP 8      | Hyperplasia        | 65  | 37.90 | hyperplastic endometrium with atypia    |             |
| HP 9      | Hyperplasia        | 58  | 37.93 | hyperplastic endometrium with atypia    |             |
| HP 10     | Hyperplasia        | 61  | 48.13 | hyperplastic endometrium with atypia    |             |
| HP 11     | Hyperplasia        | 50  | 36.03 | hyperplastic endometrium with atypia    |             |
| HP 12     | Hyperplasia        | 59  | 38.01 | hyperplastic endometrium with atypia    |             |
| HP 13     | Hyperplasia        | 60  | 37.56 | hyperplastic endometrium with atypia    |             |
| HP 14     | Hyperplasia        | 59  | 32.89 | hyperplastic endometrium with atypia    |             |
| HP 15     | Hyperplasia        | 61  | 33.75 | hyperplastic endometrium with atypia    |             |
| HP 16     | Hyperplasia        | 48  | 39.00 | hyperplastic endometrium with atypia    |             |
| HP 17     | Hyperplasia        | 55  | 37.25 | hyperplastic endometrium with atypia    |             |
| HP 18     | Hyperplasia        | 54  | 40.00 | hyperplastic endometrium with atypia    |             |
| HP 19     | Hyperplasia        | 58  | 42.02 | hyperplastic endometrium with atypia    |             |

|         |             |    |       |                                      |
|---------|-------------|----|-------|--------------------------------------|
| HP 20   | Hyperplasia | 59 | 44.20 | hyperplastic endometrium with atypia |
| Ctrl 1  | Control     | 48 | 28.21 | Healthy                              |
| Ctrl 2  | Control     | 43 | 39.89 | Healthy                              |
| Ctrl 3  | Control     | 63 | 41.62 | Healthy                              |
| Ctrl 4  | Control     | 44 | 46.93 | Healthy                              |
| Ctrl 5  | Control     | 65 | 30.02 | Healthy                              |
| Ctrl 6  | Control     | 52 | 24.90 | Healthy                              |
| Ctrl 7  | Control     | 52 | 23.70 | Healthy                              |
| Ctrl 8  | Control     | 52 | 23.30 | Healthy                              |
| Ctrl 9  | Control     | 43 | 39.90 | Healthy                              |
| Ctrl 10 | Control     | 43 | 39.80 | Healthy                              |
| Ctrl 11 | Control     | 40 | 39.02 | Healthy                              |
| Ctrl 12 | Control     | 43 | 29.20 | Healthy                              |
| Ctrl 13 | Control     | 47 | 33.02 | Healthy                              |
| Ctrl 14 | Control     | 52 | 35.23 | Healthy                              |
| Ctrl 15 | Control     | 58 | 28.00 | Healthy                              |
| Ctrl 16 | Control     | 62 | 37.89 | Healthy                              |
| Ctrl 17 | Control     | 70 | 35.00 | Healthy                              |
| Ctrl 18 | Control     | 71 | 39.00 | Healthy                              |
| Ctrl 19 | Control     | 69 | 35.00 | Healthy                              |
